# Supplementary material for: Neurocognitive function in HIV-infected persons with asymptomatic cryptococcal antigenemia: a comparison of three prospective cohorts
Source: Springer Nature journal article supplement (doi:10.1186/s12883-017-0878-2), 2017-06-12
Supplement: MOESM1 [file 12358632]

**Additional Table 1.** Neuropsychological test battery and neurocognitive domains evaluated.

| Test                            | Test Description                                                                                                                                                                                                                                 | Cognitive Domains                              |
|---------------------------------|--------------------------------------------------------------------------------------------------------------------------------------------------------------------------------------------------------------------------------------------------|------------------------------------------------|
| WHO-UCLA AVLT-Total*            | Subjects are asked to recall a list of words. The test is similar to the Rey Auditory Verbal Learning test, however words have been selected to be recognizable to a variety of cultures                                                         | Verbal learning                                |
| Digit Span Forward and Backward | Subjects are given a series of digits of increasing length and are asked to repeat them in forward or backward order                                                                                                                             | Attention, Working memory                      |
| Semantic Verbal Fluency         | Subjects are given 60 seconds to produce as many words as possible within a specific category such as 'animals'                                                                                                                                  | Language fluency (Verbal)                      |
| WAIS-III Symbol Digit           | Subjects are asked to match symbols to numbers as quickly as possible over 120 seconds using a visual reference.; also referred to as a Digit Symbol Substitution Test.                                                                          | Speed of information processing, Concentration |
| Color Trails 1                  | Subjects connect encircled numbers scattered on a page in sequence during a set amount of time. This test is similar to the Trail Making Test but has been formulated to minimize cultural bias by not using any letters or written instructions | Speed of information processing, Attention     |
| Color Trails 2                  | Similar to The Color Trails 1 but each number is printed in two different colors, and subjects are asked to maintain the numerical sequence while alternating colors                                                                             | Executive function                             |
| Grooved Pegboard                | Subjects are timed while placing pegs which each have a key along one side in holes in various orientations in a pegboard with either their dominant or non-dominant hand                                                                        | Fine motor                                     |
| Finger tapping                  | Subjects tap as rapidly as possible using the index finger on a specially adapted tapper for five 10-second trials                                                                                                                               | Motor speed                                    |

WHO-ULCA AVLT = World Health Organization-University of California-Los Angeles Auditory Verbal Learning test; WAIS = Wechsler Adult Intelligence Scale
