# Supplementary material for: Neurocognitive function in HIV-infected persons with asymptomatic cryptococcal antigenemia: a comparison of three prospective cohorts
Source: Springer Nature journal article supplement (doi:10.1186/s12883-017-0878-2), 2017-06-12
Supplement: MOESM3 [file 12358632]

**Additional Table 2.** Neurocognitive test average Z-scores for CrAg- vs. asymptomatic CrAg+ vs. Cryptococcal meningitis survivors

| Neurocognitive Test           | Cohort A<br>Cryptococcal Meningitis<br>N=90 |         |       | Cohort B<br>Asymptomatic CrAg+<br>N=87 |         |       | Cohort C<br>HIV+ controls N=125 |         |       | A vs. B<br>P-value | B vs. C<br>P-value |
|-------------------------------|---------------------------------------------|---------|-------|----------------------------------------|---------|-------|---------------------------------|---------|-------|--------------------|--------------------|
|                               | N skipped                                   | Average | SD    | N skipped                              | Average | SD    | N skipped                       | Average | SD    |                    |                    |
| Symbol digit modalities       | 24                                          | -2.16   | ±1.06 | 20                                     | -2.00   | ±1.17 | 0                               | -0.96   | ±1.11 | 0.33               | <0.001             |
| Grooved pegboard dominant     | 22                                          | -1.93   | ±2.50 | 11                                     | -0.34   | ±1.31 | 0                               | -0.98   | ±2.29 | <0.001             | 0.02               |
| Grooved pegboard non-dominant | 22                                          | -1.70   | ±2.21 | 11                                     | -0.42   | ±1.53 | 0                               | -1.36   | ±3.49 | <0.001             | 0.02               |
| Color Trails 1                | 34                                          | -3.72   | ±3.01 | 26                                     | -2.59   | ±2.69 | 0                               | -2.18   | ±2.97 | 0.01               | 0.30               |
| Color Trails 2                | 38                                          | -4.05   | ±2.47 | 32                                     | -3.84   | ±2.61 | 0                               | -2.92   | ±2.62 | 0.58               | 0.01               |
| Digit span forward            | 2                                           | -0.65   | ±1.05 | 1                                      | -0.53   | ±0.92 | 0                               | 0.17    | ±1.18 | 0.44               | <0.001             |
| Digit span backward           | 2                                           | -1.55   | ±1.31 | 1                                      | -1.63   | ±1.47 | 0                               | -1.15   | ±0.82 | 0.70               | 0.003              |
| Auditory verbal learning      | 2                                           | -2.43   | ±1.50 | 1                                      | -2.24   | ±1.32 | 0                               | -1.48   | ±1.23 | 0.36               | <0.001             |
| Verbal fluency                | 4                                           | -0.98   | ±0.63 | 1                                      | -1.01   | ±0.73 | 0                               | -0.48   | ±0.63 | 0.78               | <0.001             |
| Finger tapping                | 19                                          | -2.57   | ±1.50 | 9                                      | -2.33   | ±1.16 | 0                               | -1.32   | ±1.12 | 0.24               | <0.001             |
| QNPZ-8                        | 40                                          | -2.22   | ±1.25 | 36                                     | -1.80   | ±1.03 | 0                               | -1.36   | ±1.02 | 0.02               | 0.003              |

Numbers represent Z-scores referenced against age and education adjusted, HIV-negative Ugandan population norms. *P*-values were calculated using student's t-test. SD = standard deviation.
